# Supplementary material for: Residual Plasmodium falciparum Parasitemia in Kenyan Children After Artemisinin-Combination Therapy Is Associated With Increased Transmission to Mosquitoes and Parasite Recurrence
Source: PubMed Central journal article supplement — J Infect Dis. 2013 Aug 14;208(12):2017–24. doi: 10.1093/infdis/jit431 (PMC3836468; doi:10.1093/infdis/jit431), 2013-08-14

Supporting information

**Figure S1. Scatter plot of qPCR signal and QT-NASBA gametocyte prevalence on day 3.** The estimated concentration of *P. falciparum* DNA relative to baseline is given on the Y-axis for children who were gametocyte negative or positive by Pfs25 QT-NASBA on the same day.

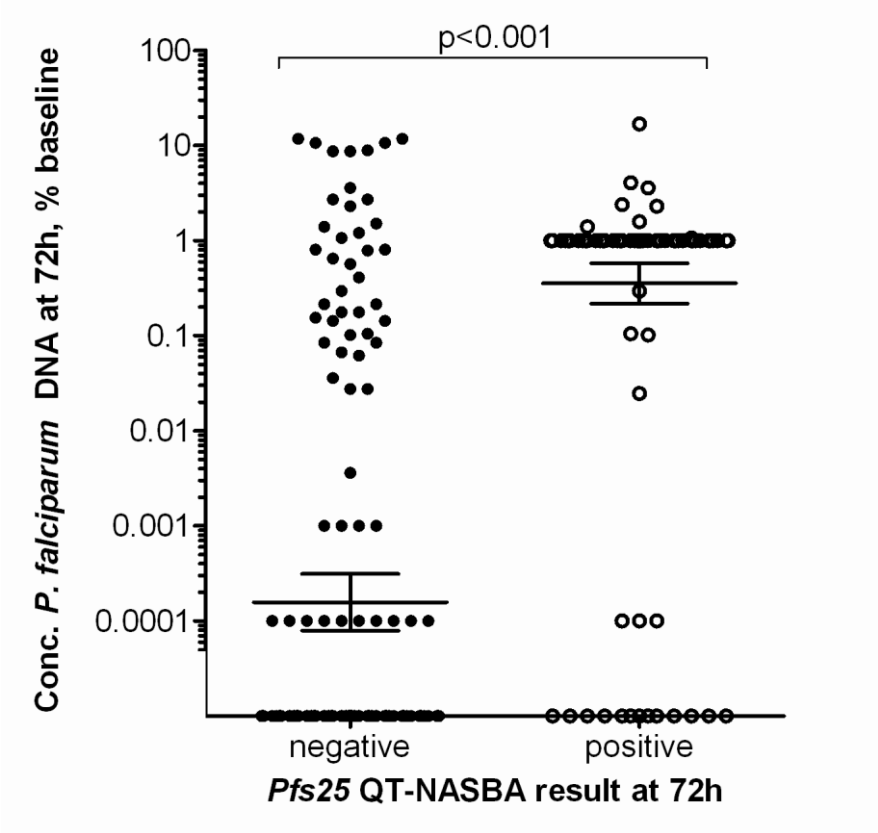

Supplement: supp_jit431_jit431supp_fig1.pdf [file supp_jit431_jit431supp_fig1.pdf]
